# Supplementary material for: Paleotropical Diversification Dominates the Evolution of the Hyperdiverse Ant Tribe Crematogastrini (Hymenoptera: Formicidae)
Source: Oxford University Press journal article supplement (doi:10.1093/isd/ixy013), 2018-09-01
Supplement: ixy013_suppl_supplementary_table_s1_s7.pdf [file ixy013_suppl_supplementary_table_s1_s7.pdf]

Supplementary data for: **Blaimer et al. 2018. Paleotropical diversification dominates the evolution of the hyperdiverse ant tribe Crematogastrini (Hymenoptera: Formicidae). Insect Systematics and Diversity.**

**Table S1: Voucher collection information for specimens included in this study.** Full collection information, including collecting locality and collector, is available from Antweb ([www.antweb.org](http://www.antweb.org)).

| <b>Genus</b>          | <b>Species</b>            | <b>Pinned Voucher</b> | <b>Located</b> | <b>CollectionCode</b> |
|-----------------------|---------------------------|-----------------------|----------------|-----------------------|
| <i>Acanthomyrmex</i>  | <i>ferox</i>              | CASENT0106243         | UCDC           | PSW16449-02           |
| <i>Acanthoponera</i>  | <i>minor</i>              | CASENT0039772         | CASC           | AVS2505               |
| <i>Adlerzia</i>       | <i>froggatti</i>          | CASENT0227591         | CASC           | ANTC17797             |
| <i>Ancyridris</i>     | <i>polyrhachioides_nr</i> | CASENT0106303         | UCDC           | MJ2015                |
| <i>Aphaenogaster</i>  | <i>swammerdami</i>        | CASENT0498428         | CASC           | BLF10111              |
| <i>Aretidris</i>      | <i>buenaventei</i>        | CASENT0106232         | UCDC           | ANTC4121              |
| <i>Atopomyrmex</i>    | <i>mocquerysi</i>         | CASENT0415562         | CASC           | BLF4036               |
| <i>Atopomyrmex</i>    | <i>cryptoceroides</i>     | USNMENT01118238       | USNM           | n/a                   |
| <i>Calypatomyrmex</i> | <i>kaurus</i>             | CASENT0417155         | CASC           | BLF4130(9)            |
| <i>Calypatomyrmex</i> | <i>MM01</i>               | USNMENT01118314       | NCSU           | BBB644-ANTS-12        |
| <i>Cardiocondyla</i>  | <i>mauritanica</i>        | CASENT0106115         | UCDC           | PSW14593              |
| <i>Cardiocondyla</i>  | <i>thoracica</i>          | CASENT0106252         | UCDC           | EMS666                |
| <i>Cardiocondyla</i>  | <i>MY01</i>               | CASENT0106253         | UCDC           | ANTC11095             |
| <i>Carebara</i>       | <i>affinis</i>            | CASENT0106016         | UCDC           | PSW15364              |
| <i>Carebara</i>       | <i>jajoby</i>             | CASENT0494760         | CASC           | BLF9011               |
| <i>Carebara</i>       | <i>AU01</i>               | CASENT0106279         | UCDC           | PSW15690-14           |
| <i>Carebara</i>       | <i>pygmaea</i>            | CASENT0106280         | UCDC           | PSW16432              |
| <i>Carebara</i>       | <i>urichi</i>             | CASENT0106295         | UCDC           | MGB1266               |
| <i>Carebara</i>       | <i>vidua</i>              | CASENT0260120         | CASC           | ANTC18508             |
| <i>Cataulacus</i>     | <i>ebrardi</i>            | CASENT0487553         | CASC           | BLF10344              |
| <i>Cataulacus</i>     | <i>hispidulus</i>         | CASENT0106277         | UCDC           | PSW16462              |
| <i>Cataulacus</i>     | <i>guineensis</i>         | USNMENT01118242       | USNM           | n/a                   |
| <i>Cataulacus</i>     | <i>muticus</i>            | USNMENT01118362       | NCSU           | BBB887                |
| <i>Crematogaster</i>  | <i>emeryana</i>           | CASENT0106034         | UCDC           | PSW14954              |
| <i>Crematogaster</i>  | <i>kelleri</i>            | CASENT0498885         | CASC           | BLF10001              |
| <i>Crematogaster</i>  | <i>acuta</i>              | CASENT0106245         | UCDC           | PSW16026              |
| <i>Crematogaster</i>  | <i>modiglianii</i>        | CASENT0106281         | UCDC           | PSW16428              |
| <i>Crematogaster</i>  | <i>lotti</i>              | CASENT0320362         | NCSU           | BBB496                |
| <i>Crematogaster</i>  | <i>malala</i>             | CASENT0142136         | CASC           | BLF20486              |
| <i>Crematogaster</i>  | <i>meijerei</i>           | CASENT0193685         | NCSU           | MJ1116                |
| <i>Crematogaster</i>  | <i>aberrans</i>           | CASENT0193779         | NCSU           | SH09-Ind-01           |
| <i>Crematogaster</i>  | <i>alafara</i>            | CASENT0492850-52      | CASC           | BLF08628              |
| <i>Crematogaster</i>  | <i>rogenhoferi_cf</i>     | CASENT0193596         | NCSU           | PSW16464              |
| <i>Crematogaster</i>  | <i>flavitarsis</i>        | CASENT0193701         | NCSU           | hp0073                |
| <i>Crematogaster</i>  | <i>fruhstorferi</i>       | CASENT0193728         | NCSU           | MJ-Kali-08-24         |
| <i>Crematogaster</i>  | <i>MM02</i>               | USNMENT01118270       | NCSU           | BBB-647-ANTS-20       |
| <i>Crematogaster</i>  | <i>macracantha</i>        | CASENT0320315         | NCSU           | JD-05-267             |
| <i>Crematogaster</i>  | <i>sordidula</i>          | CASENT0193797         | NCSU           | BBB304                |

| <b>Genus</b>         | <b>Species</b>          | <b>Pinned Voucher</b> | <b>Located</b> | <b>CollectionCode</b> |
|----------------------|-------------------------|-----------------------|----------------|-----------------------|
| <i>Crematogaster</i> | <i>longispina</i>       | CASENT0193767         | NCSU           | JTL6196               |
| <i>Crematogaster</i> | <i>telolafy</i>         | CASENT0492527         | NCSU           | BLF7652               |
| <i>Cyphoidris</i>    | <i>exalta</i>           | CASENT0405993         | CASC           | BLF4000(49)           |
| <i>Dacatria</i>      | <i>templaris</i>        | CASENT0235148         | CASC           | EG04x06-01            |
| <i>Dacatinops</i>    | <i>ignotus_cf</i>       | CASENT0215429         | UCDC           | RAPII047.76           |
| <i>Dacatinops</i>    | <i>cirrosus</i>         | USNMENT01117909       | NCSU           | BBB797-ANTS-10        |
| <i>Dicroaspis</i>    | <i>KM01</i>             | CASENT0145951         | CASC           | BLF21317              |
| <i>Dilobocondyla</i> | <i>borneensis_cf</i>    | CASENT0106130         | UCDC           | PSW15526              |
| <i>Dilobocondyla</i> | <i>MY01</i>             | CASENT0217352         | Hashimoto      | MY426                 |
| <i>Dilobocondyla</i> | <i>MM01</i>             | USNMENT01117220       | NCSU           | BBB559                |
| <i>Diplomorium</i>   | <i>longipenne</i>       | CASENT0217046         | CASC           | EN1-T-HC-F10          |
| <i>Eutetramorium</i> | <i>mocquerysi</i>       | CASENT0077435         | CASC           | BLF9714               |
| <i>Formica</i>       | <i>moki</i>             | CASENT0106084         | UCDC           | PSW14318              |
| <i>Formicoxenus</i>  | <i>diversipilosus</i>   | CASENT0106244         | UCDC           | PSW16203              |
| <i>Gauromyrmex</i>   | <i>acanthinus</i>       | CASENT0126225         | UCDC           | ANTC4201              |
| <i>Harpagoxenus</i>  | <i>sublaevis</i>        | CASENT0106289         | UCDC           | MLB49-1               |
| <i>Huberia</i>       | <i>brounii</i>          | CASENT0106136         | UCDC           | ANTC4014              |
| <i>Huberia</i>       | <i>striata</i>          | USNMENT01118232       | USNM           | n/a                   |
| <i>Indomyrma</i>     | <i>dasypyx</i>          | MCZ594236             | MCZC           | n/a                   |
| <i>Kartidris</i>     | <i>sparsipila</i>       | CASENT0235130         | CASC           | BLF27472              |
| <i>Lasiomyrma</i>    | <i>IN01</i>             | CASENT0366611         | CASC           | F89424                |
| <i>Lasiomyrma</i>    | <i>IN01</i>             | CASENT0366612         | CASC           | F89425                |
| <i>Leptothorax</i>   | <i>muscorum_complex</i> | CASENT0106029         | UCDC           | PSW14909              |
| <i>Liomyrmex</i>     | <i>gestroi</i>          | CASENT0106198         | UCDC           | PSW10061              |
| <i>Lophomyrmex</i>   | <i>ambiguus</i>         | CASENT0106225         | UCDC           | PSW9612               |
| <i>Lophomyrmex</i>   | <i>bedoti_cf</i>        | USNMENT01118303       | NCSU           | BBB644-ANTS-5         |
| <i>Lordomyrma</i>    | <i>desupra</i>          | CASENT0106145         | UCDC           | PSW15766              |
| <i>Lordomyrma</i>    | <i>bhutanensis_cf</i>   | CASENT0106234         | UCDC           | ANTC4192              |
| <i>Lordomyrma</i>    | <i>AU1</i>              | CASENT0106338         | UCDC           | PSW09685-09           |
| <i>Lordomyrma</i>    | <i>PG02</i>             | CASENT0106339         | UCDC           | EMS0678               |
| <i>Lordomyrma</i>    | <i>PG01</i>             | CASENT0106340         | UCDC           | PSW10142-21           |
| <i>Lordomyrma</i>    | <i>AU03</i>             | USNMENT01118400       | USNM           | PSW09842              |
| <i>Lordomyrma</i>    | <i>AU02</i>             | CASENT0106341         | UCDC           | PSW15656-08           |
| <i>Lordomyrma</i>    | <i>PG04</i>             | CASENT0106342         | UCDC           | PSW10050-22           |
| <i>Lordomyrma</i>    | <i>PG03</i>             | USNMENT01118531       | MCZC           | E.O.Wilson#966        |
| <i>Lordomyrma</i>    | <i>epinotalis</i>       | CASENT0171169         | EMSC           | EMS2610               |
| <i>Lordomyrma</i>    | <i>MM01</i>             | USNMENT01117862       | NCSU           | BBB741-ANTS-14        |
| <i>Lordomyrma</i>    | <i>MM02</i>             | USNMENT01117963       | NCSU           | BBB839-ANTS-24        |
| <i>Malagidris</i>    | <i>jugum</i>            | CASENT0494278         | CASC           | BLF9947               |
| <i>Malagidris</i>    | <i>belti</i>            | CASENT0119117         | CASC           | BLF14912              |
| <i>Manica</i>        | <i>bradleyi</i>         | CASENT0106022         | UCDC           | PSW14755              |
| <i>Mayriella</i>     | <i>ebbei</i>            | CASENT0106116         | UCDC           | PSW13799              |
| <i>Mayriella</i>     | <i>MM01</i>             | USNMENT01117875       | NCSU           | BBB741-ANTS-17        |
| <i>Melissotarsus</i> | <i>insularis</i>        | CASENT0498665         | CASC           | BLF10081              |
| <i>Meranoplus</i>    | <i>radamae</i>          | CASENT0486686         | CASC           | BLF7226               |

| <b>Genus</b>         | <b>Species</b>       | <b>Pinned Voucher</b> | <b>Located</b> | <b>CollectionCode</b> |
|----------------------|----------------------|-----------------------|----------------|-----------------------|
| <i>Meranoplus</i>    | <i>castaneus</i>     | CASENT0106276         | UCDC           | PSW16480              |
| <i>Meranoplus</i>    | <i>mcarthuri</i>     | USNMENT01118234       | USNM           | n/a                   |
| <i>Meranoplus</i>    | <i>fenestrata</i>    | USNMENT01118401       | USNM           | TRS990104-03          |
| <i>Meranoplus</i>    | <i>mayri</i>         | CASENT0347642         | CASC           | BLF25625              |
| <i>Metapone</i>      | <i>madagascarica</i> | CASENT0004528         | CASC           | BLF4840               |
| <i>Metapone</i>      | <i>PG01</i>          | CASENT0106132         | UCDC           | ANTC4009              |
| <i>Monomorium</i>    | <i>hanneli</i>       | CASENT0151856         | CASC           | BLF22509              |
| <i>Myrmecina</i>     | <i>graminicola</i>   | CASENT0106054         | UCDC           | PSW14658              |
| <i>Myrmecina</i>     | <i>PG01</i>          | CASENT0106283         | UCDC           | EMS712                |
| <i>Myrmecina</i>     | <i>americana</i>     | CASENT0106284         | UCDC           | PSW16654              |
| <i>Myrmecina</i>     | <i>striata</i>       | USNMENT01118317       | NCSU           | BBB642-ANTS-23        |
| <i>Nesomyrmex</i>    | <i>echinatinodis</i> | CASENT0106044         | UCDC           | PSW15105              |
| <i>Nesomyrmex</i>    | <i>brunneus</i>      | CASENT0008660         | CASC           | ANTC1302              |
| <i>Nesomyrmex</i>    | <i>hafahafa</i>      | CASENT0460666         | CASC           | BLF6010               |
| <i>Nesomyrmex</i>    | <i>madecassus</i>    | CASENT0487130         | CASC           | BLF9369               |
| <i>Nesomyrmex</i>    | <i>wilda</i>         | CASENT0106231         | UCDC           | PSW15599              |
| <i>Ocymyrmex</i>     | <i>fortior_cf</i>    | CASENT0106140         | UCDC           | PSW15556              |
| <i>Ocymyrmex</i>     | <i>celer</i>         | USNMENT01118236       | USNM           | n/a                   |
| <i>Ocymyrmex</i>     | <i>nitidulus</i>     | USNMENT01118237       | USNM           | n/a                   |
| <i>Ocymyrmex</i>     | <i>picardi</i>       | USNMENT01118235       | USNM           | n/a                   |
| <i>Paratopula</i>    | <i>TH01</i>          | CASENT0010838         | UCDC           | ANTC2893              |
| <i>Perissomyrmex</i> | <i>snyderi</i>       | CASENT0106226         | UCDC           | MGB793                |
| <i>Pheidole</i>      | <i>longispinosa</i>  | CASENT0494701         | CASC           | BLF8915               |
| <i>Podomyrma</i>     | <i>silvicola</i>     | CASENT0106143         | UCDC           | PSW15711              |
| <i>Podomyrma</i>     | <i>laevifrons</i>    | USNMENT01118240       | USNM           | n/a                   |
| <i>Podomyrma</i>     | <i>ruficeps</i>      | USNMENT01118241       | USNM           | n/a                   |
| <i>Podomyrma</i>     | <i>adelaidae</i>     | USNMENT01118402       | USNM           | TRS990104-02          |
| <i>Poecilomyrma</i>  | <i>myrmecodiae</i>   | CASENT0106144         | UCDC           | PSW15764              |
| <i>Pogonomyrmex</i>  | <i>imberbicus</i>    | CASENT0005713         | UCDC           | PSW14699              |
| <i>Pristomyrmex</i>  | <i>orbiceps</i>      | CASENT0417737         | CASC           | BLF4130(37)           |
| <i>Pristomyrmex</i>  | <i>punctatus</i>     | CASENT0106274         | UCDC           | PSW16460-03           |
| <i>Pristomyrmex</i>  | <i>rigidus</i>       | USNMENT01118346       | NCSU           | BBB644-ANTS-4         |
| <i>Proatta</i>       | <i>butteli</i>       | CASENT0007617         | CASC           | WDSA051               |
| <i>Propodilobus</i>  | <i>pingorum</i>      | Antbase.net01463      | ABNC           | ANTC4123              |
| <i>Recurvidris</i>   | <i>TH01</i>          | CASENT0131659         | CASC           | T0301                 |
| <i>Recurvidris</i>   | <i>MM01</i>          | USNMENT01118089       | NCSU           | BBB643-ANTS-9         |
| <i>Rhopalomastix</i> | <i>rothneyi</i>      | CASENT0106013         | UCDC           | PSW15358              |
| <i>Rhytidoponera</i> | <i>chalybaea</i>     | CASENT0106000         | UCDC           | PSW15295              |
| <i>Romblonella</i>   | <i>scrobifera</i>    | CASENT0106224         | UCDC           | PSW10144              |
| <i>Romblonella</i>   | <i>elysii</i>        | USNMENT01118239       | USNM           | n/a                   |
| <i>Rostromyrmex</i>  | <i>pasohensis</i>    | CASENT0106343         | UCDC           | PSW17159-2            |
| <i>Rotastruma</i>    | <i>recava</i>        | CASENT0106250         | UCDC           | PSW9601               |
| <i>Rotastruma</i>    | <i>stenoceps</i>     | CASENT0106285         | UCDC           | PSW16603              |
| <i>Royidris</i>      | <i>notorthotenes</i> | CASENT0002259         | CASC           | BLF5708               |
| <i>Royidris</i>      | <i>longiseta</i>     | CASENT0120396         | CASC           | BLF16147              |

| <b>Genus</b>            | <b>Species</b>         | <b>Pinned Voucher</b> | <b>Located</b> | <b>CollectionCode</b> |
|-------------------------|------------------------|-----------------------|----------------|-----------------------|
| <i>Stereomyrmex</i>     | <i>horni</i>           | MCZ594252             | MCZC           | n/a                   |
| <i>Strongylognathus</i> | <i>testaceus</i>       | CASENT0106266         | UCDC           | ANTC11100             |
| <i>Temnothorax</i>      | <i>rugatulus</i>       | CASENT0106025         | UCDC           | PSW14868              |
| <i>Temnothorax</i>      | <i>poeyi</i>           | CASENT0106241         | UCDC           | PSW14471-3            |
| <i>Temnothorax</i>      | <i>bernardi</i>        | CASENT0106299         | UCDC           | ANTC11110             |
| <i>Temnothorax</i>      | <i>kutteri</i>         | CASENT0106300         | UCDC           | ANTC11111             |
| <i>Terataner</i>        | <i>MG27</i>            | CASENT0494256         | CASC           | BLF9930               |
| <i>Terataner</i>        | <i>MG02</i>            | CASENT0494349         | CASC           | BLF9911               |
| <i>Terataner</i>        | <i>bottegoi</i>        | CASENT0106298         | UCDC           | PSW11162              |
| <i>Tetheamyрма</i>      | <i>subsporgia</i>      | CASENT0106305         | UCDC           | PSW16443-83           |
| <i>Tetramorium</i>      | <i>validiusculum</i>   | CASENT0106004         | UCDC           | PSW15315              |
| <i>Tetramorium</i>      | <i>immigrans</i>       | CASENT0106026         | UCDC           | PSW14871              |
| <i>Tetramorium</i>      | <i>venator</i>         | CASENT0415619         | CASC           | BLF4007               |
| <i>Tetramorium</i>      | <i>CF01</i>            | CASENT0006833         | CASC           | BLF4031               |
| <i>Tetramorium</i>      | <i>severini</i>        | CASENT0494149         | CASC           | BLF9786               |
| <i>Tetramorium</i>      | <i>MG125</i>           | CASENT0048793         | CASC           | BLF09975              |
| <i>Tetramorium</i>      | <i>transversinodis</i> | CASENT0106251         | UCDC           | PSW13860              |
| <i>Tetramorium</i>      | <i>atratum</i>         | CASENT0106265         | UCDC           | ANTC11099             |
| <i>Tetramorium</i>      | <i>spinosum</i>        | CASENT0106287         | UCDC           | PSW15597              |
| <i>Tetramorium</i>      | <i>taylori</i>         | CASENT0106297         | UCDC           | PSW15699              |
| <i>Tetramorium</i>      | <i>kutteri</i>         | CASENT0106301         | UCDC           | ANTC11112             |
| <i>Trichomyrmex</i>     | <i>criniceps</i>       | CASENT0106263         | UCDC           | PSW13849-05           |
| <i>Trichomyrmex</i>     | <i>destructor</i>      | CASENT0147465         | CASC           | BLF21273              |
| <i>Trichomyrmex</i>     | <i>robustior</i>       | CASENT0147087         | CASC           | BLF21967              |
| <i>Vitsika</i>          | <i>brevis</i>          | CASENT0494750         | CASC           | BLF9031               |
| <i>Vitsika</i>          | <i>susplicax</i>       | CASENT0068044         | CASC           | BLF13657              |
| <i>Vitsika</i>          | <i>producta</i>        | CASENT0320458         | CASC           | BBB483                |
| <i>Vollenhovia</i>      | <i>emeryi</i>          | CASENT0010125         | USNM           | ANTC4012              |
| <i>Vollenhovia</i>      | <i>rufiventris</i>     | USNMENT01118243       | USNM           | n/a                   |
| <i>Vollenhovia</i>      | <i>MM01</i>            | USNMENT01118334       | NCSU           | BBB688-ANTS-27        |
| <i>Vombisidris</i>      | <i>bilongrudi</i>      | CASENT0200241         | UCDC           | AL0578.01             |
| <i>Xenomyrmex</i>       | <i>floridanus</i>      | CASENT0106053         | UCDC           | PSW14443              |
| <i>Xenomyrmex</i>       | <i>stollii</i>         | USNMENT00444122       | USNM           | n/a                   |

**Table S2: Fossil calibrations used in this study.** These are similar to calibration densities used in Ward *et al.* (2015) except that we incorporated updated younger estimates for Baltic amber (Aleksandrova and Zaporozhets (2008)) and Sicilian amber (LaPolla, 2013) into our calibration priors.

| Genus                | Calibration type                                       | Distribution | Offset | Median | Quartile | Input-mean | Input-sd | Reference                                                                                                                                                                                                                                                                                                   |
|----------------------|--------------------------------------------------------|--------------|--------|--------|----------|------------|----------|-------------------------------------------------------------------------------------------------------------------------------------------------------------------------------------------------------------------------------------------------------------------------------------------------------------|
| <i>Carebara</i>      | stem-group                                             | lognormal    | 36     | 52     | 73       | 2.77       | 0.51     | <i>Carebara antiqua</i> in Baltic amber (Mayr, 1868; Wheeler, 1915). Upper bound is approximate estimated age of ‘core Myrmicinae’ (Brady et al., 2006).                                                                                                                                                    |
| <i>Cataulacus</i>    | stem-group                                             | lognormal    | 20     | 40     | 73       | 3          | 0.59     | Two species of <i>Cataulacus</i> described from Sicilian amber (Emery, 1891).                                                                                                                                                                                                                               |
| <i>Crematogaster</i> | crown<br><i>Crematogaster</i><br>( <i>Orthocrema</i> ) | lognormal    | 15     | 28     | 35       | 2.55       | 0.27     | <i>Crematogaster crinosa</i> -group in Dominican amber (Blaimer, 2012b). The calibrated node represents crown <i>Crematogaster</i> ( <i>Orthocrema</i> ). Median age from Blaimer (2012b).                                                                                                                  |
| <i>Nesomyrmex</i>    | stem <i>N. wilda</i> &<br><i>N. echinatinodes</i>      | lognormal    | 15     | 40     | 73       | 3.2        | 0.52     | Two described species of <i>Nesomyrmex</i> from Dominican amber, similar to <i>N. wilda</i> and <i>N. echinatinodis</i> , respectively (De Andrade et al., 1999), here used conservatively to calibrate the node representing the most recent common ancestor (MRCA) of the NewWorld and Old World species. |
| <i>Pristomyrmex</i>  | stem-group                                             | lognormal    | 42     | 52     | 73       | 2.3        | 0.7      | <i>Pristomyrmex</i> in late Eocene Danish amber (Dlussky & Radchenko, 2011).                                                                                                                                                                                                                                |
| <i>Temnothorax</i>   | stem-group                                             | lognormal    | 36     | 52     | 73       | 2.77       | 0.51     | Six described species of <i>Temnothorax</i> in Baltic amber (Dlussky & Rasnitsyn, 2009).                                                                                                                                                                                                                    |
| <i>Tetramorium</i>   | stem-group                                             | lognormal    | 36     | 52     | 73       | 2.77       | 0.51     | Three undescribed species of <i>Tetramorium</i> in Baltic amber (Dlussky & Rasnitsyn, 2009).                                                                                                                                                                                                                |

**Table S3: Generic distributions and nesting preferences.** Distributions taken from Ward *et al.* (2015) or scored using [www.antmaps.org](http://www.antmaps.org). T = Neotropical, N = Nearctic, P = Palearctic (Eurasia + North Africa), E = Afrotropical, M= Malagasy, O = Indomalayan, A = Australasian. 0 = absent, 1 = present.

|                       | T | N | P | E | M | O | A | Nesting preference |
|-----------------------|---|---|---|---|---|---|---|--------------------|
| <i>Acanthomyrmex</i>  | 0 | 0 | 0 | 0 | 0 | 1 | 1 | 0                  |
| <i>Adlerzia</i>       | 0 | 0 | 0 | 0 | 0 | 0 | 1 | 0                  |
| <i>Aretidris</i>      | 0 | 0 | 0 | 0 | 0 | 1 | 0 | 0                  |
| <i>Atopomyrmex</i>    | 0 | 0 | 0 | 1 | 0 | 0 | 0 | 1                  |
| <i>Calypatomyrmex</i> | 0 | 0 | 0 | 1 | 0 | 1 | 1 | 0                  |
| <i>Cardiocondyla</i>  | 0 | 0 | 1 | 1 | 1 | 1 | 1 | 0                  |
| <i>Carebara</i>       | 1 | 1 | 1 | 1 | 1 | 1 | 1 | 0                  |
| <i>Cataulacus</i>     | 0 | 0 | 0 | 1 | 1 | 1 | 1 | 1                  |
| <i>Crematogaster</i>  | 1 | 1 | 1 | 1 | 1 | 1 | 1 | 0&1                |
| <i>Cyphoidris</i>     | 0 | 0 | 0 | 1 | 0 | 0 | 0 | 0                  |
| <i>Dacatria</i>       | 0 | 0 | 1 | 0 | 0 | 1 | 0 | 0                  |
| <i>Dacetonops</i>     | 0 | 0 | 0 | 0 | 0 | 1 | 1 | 0                  |
| <i>Dicroaspis</i>     | 0 | 0 | 0 | 1 | 0 | 0 | 0 | 0                  |
| <i>Dilobocondyla</i>  | 0 | 0 | 0 | 0 | 0 | 1 | 1 | 1                  |
| <i>Diplomorium</i>    | 0 | 0 | 0 | 1 | 0 | 0 | 0 | 0                  |
| <i>Eutetramorium</i>  | 0 | 0 | 0 | 0 | 1 | 0 | 0 | 0                  |
| <i>Formicoxenus</i>   | 0 | 1 | 1 | 0 | 0 | 0 | 0 | 0                  |
| <i>Gauromyrmex</i>    | 0 | 0 | 0 | 0 | 0 | 1 | 0 | 1                  |
| <i>Harpagoxenus</i>   | 0 | 1 | 1 | 0 | 0 | 0 | 0 | 0                  |
| <i>Huberia</i>        | 0 | 0 | 0 | 0 | 0 | 0 | 1 | 0                  |
| <i>Indomyrma</i>      | 0 | 0 | 0 | 0 | 0 | 1 | 0 | 0                  |
| <i>Kartidris</i>      | 0 | 0 | 0 | 0 | 0 | 1 | 0 | 0                  |
| <i>Leptothorax</i>    | 0 | 1 | 1 | 0 | 0 | 0 | 0 | 0&1                |
| <i>Liomyrmex</i>      | 0 | 0 | 0 | 0 | 0 | 1 | 1 | 0                  |
| <i>Lophomyrmex</i>    | 0 | 0 | 0 | 0 | 0 | 1 | 1 | 0                  |
| <i>Lordomyrma</i>     | 0 | 0 | 0 | 0 | 0 | 1 | 1 | 0                  |
| <i>Malagidris</i>     | 0 | 0 | 0 | 0 | 1 | 0 | 0 | 0                  |
| <i>Mayriella</i>      | 0 | 0 | 0 | 0 | 0 | 1 | 1 | 0                  |
| <i>Melissotarsus</i>  | 0 | 0 | 0 | 1 | 1 | 0 | 0 | 1                  |
| <i>Meranoplus</i>     | 0 | 0 | 0 | 1 | 1 | 1 | 1 | 0                  |
| <i>Metapone</i>       | 0 | 0 | 0 | 1 | 1 | 1 | 1 | 0                  |
| <i>Myrmecina</i>      | 0 | 1 | 1 | 0 | 0 | 1 | 1 | 0                  |
| <i>Nesomyrmex</i>     | 1 | 1 | 0 | 1 | 1 | 0 | 0 | 1                  |
| <i>Ocymyrmex</i>      | 0 | 0 | 0 | 1 | 0 | 0 | 0 | 0                  |

|                      | <b>T</b> | <b>N</b> | <b>P</b> | <b>E</b> | <b>M</b> | <b>O</b> | <b>A</b> | <b>Nesting<br/>preference</b> |
|----------------------|----------|----------|----------|----------|----------|----------|----------|-------------------------------|
| <i>Paratopula</i>    | 0        | 0        | 0        | 0        | 0        | 1        | 1        | 1                             |
| <i>Perissomyrmex</i> | 1        | 0        | 0        | 0        | 0        | 1        | 0        | 0                             |
| <i>Podomyrma</i>     | 0        | 0        | 0        | 0        | 0        | 0        | 1        | 1                             |
| <i>Poecilomyrma</i>  | 0        | 0        | 0        | 0        | 0        | 0        | 1        | 1                             |
| <i>Pristomyrmex</i>  | 0        | 0        | 0        | 1        | 0        | 1        | 1        | 0                             |
| <i>Proatta</i>       | 0        | 0        | 0        | 0        | 0        | 1        | 0        | 0                             |
| <i>Recurvidris</i>   | 0        | 0        | 0        | 0        | 0        | 1        | 1        | 0                             |
| <i>Rhopalomastix</i> | 0        | 0        | 0        | 0        | 0        | 1        | 1        | 1                             |
| <i>Romblonella</i>   | 0        | 0        | 0        | 0        | 0        | 1        | 1        | 1                             |
| <i>Rostromyrmex</i>  | 0        | 0        | 0        | 0        | 0        | 1        | 0        | 0                             |
| <i>Rotastruma</i>    | 0        | 0        | 0        | 0        | 0        | 1        | 0        | 1                             |
| <i>Royidris</i>      | 0        | 0        | 0        | 0        | 1        | 0        | 0        | 0                             |
| <i>Stereomyrmex</i>  | 0        | 0        | 0        | 0        | 0        | 1        | 1        | 0                             |
| <i>Temnothorax</i>   | 1        | 1        | 1        | 1        | 0        | 1        | 0        | 0&1                           |
| <i>Terataner</i>     | 0        | 0        | 0        | 1        | 1        | 0        | 0        | 1                             |
| <i>Tetheamyрма</i>   | 0        | 0        | 0        | 0        | 0        | 1        | 0        | 0                             |
| <i>Tetramorium</i>   | 0        | 1        | 1        | 1        | 1        | 1        | 1        | 0&1                           |
| <i>Trichomyrmex</i>  | 0        | 0        | 1        | 1        | 1        | 1        | 0        | 0&1                           |
| <i>Vitsika</i>       | 0        | 0        | 0        | 0        | 1        | 0        | 0        | 1                             |
| <i>Vollenhovia</i>   | 0        | 0        | 1        | 0        | 0        | 1        | 1        | 0                             |
| <i>Vombisidris</i>   | 0        | 0        | 0        | 0        | 0        | 1        | 1        | 1                             |
| <i>Xenomyrmex</i>    | 1        | 1        | 0        | 0        | 0        | 0        | 0        | 1                             |

**Table S4: Dispersal constraints used in ancestral range estimations.** Modified from Blaimer *et al.* (2015) by recognizing the Malagasy region as a separate biogeographic region. T = Neotropical, N = Nearctic, P = Palearctic, E = Afrotropical, M= Malagasy, O = Indomalayan, A = Australasian.

| <b>0-50 Ma</b> | <b>T</b> | <b>N</b> | <b>P</b> | <b>E</b> | <b>M</b> | <b>O</b> | <b>A</b> |
|----------------|----------|----------|----------|----------|----------|----------|----------|
| <b>T</b>       | 1.0      | 1.0      | 0.01     | 0.5      | 0.01     | 0.01     | 0.5      |
| <b>N</b>       | 1.0      | 1.00     | 1.0      | 0.01     | 0.01     | 0.01     | 0.01     |
| <b>P</b>       | 0.01     | 1.0      | 1.00     | 1.0      | 0.01     | 1.0      | 0.01     |
| <b>E</b>       | 0.5      | 0.01     | 1.0      | 1.00     | 0.5      | 1.0      | 0.5      |
| <b>M</b>       | 0.01     | 0.01     | 0.01     | 0.5      | 1.00     | 0.01     | 0.01     |
| <b>O</b>       | 0.01     | 0.01     | 1.0      | 1.0      | 0.01     | 1.00     | 1.0      |
| <b>A</b>       | 0.5      | 0.01     | 0.01     | 0.5      | 0.01     | 1.0      | 1.00     |

  

| <b>50-80 Ma</b> | <b>T</b> | <b>N</b> | <b>P</b> | <b>E</b> | <b>M</b> | <b>O</b> | <b>A</b> |
|-----------------|----------|----------|----------|----------|----------|----------|----------|
| <b>T</b>        | 1        | 1.0      | 0.01     | 1.0      | 0.01     | 0.01     | 1.0      |
| <b>N</b>        | 1.0      | 1.00     | 1.0      | 0.01     | 0.01     | 0.01     | 0.01     |
| <b>P</b>        | 0.01     | 1.0      | 1.00     | 1.0      | 0.01     | 1.0      | 0.01     |
| <b>E</b>        | 1.0      | 0.01     | 1.0      | 1.00     | 0.5      | 1.0      | 1.0      |
| <b>M</b>        | 0.01     | 0.01     | 0.01     | 0.5      | 1.00     | 0.5      | 0.01     |
| <b>O</b>        | 0.01     | 0.01     | 1.0      | 1.0      | 0.50     | 1.00     | 0.5      |
| <b>A</b>        | 1.0      | 0.01     | 0.01     | 1.0      | 0.01     | 0.5      | 1.00     |



**Table S5: Species richness matrix used for diversification analyses.** This table lists the assigned clade for each species, the number of species sampled, the number of nominal species described, and the number of nominal + subspecies described per clade. From these clade-specific values we calculated sampling probabilities which were used for BAMM analyses.

|                                     | Clade     | Species sampled | Species described | Sample fraction | Species + subspecies | Sample fraction |
|-------------------------------------|-----------|-----------------|-------------------|-----------------|----------------------|-----------------|
| <i>Acanthomyrmex_ferox</i>          | Acantho   | 1               | 17                | 0.059           | 17                   | 0.059           |
| <i>Adlerzia_froggatti</i>           | Adlerzia  | 1               | 1                 | 1.000           | 1                    | 1.000           |
| <i>Aretidris_buenaventei</i>        | Aretidris | 1               | 2                 | 0.5             | 2                    | 0.500           |
| <i>Atopomyrmex_cryptoceroides</i>   | Atopo     | 2               | 3                 | 0.667           | 3                    | 0.667           |
| <i>Atopomyrmex_mocquersyi</i>       | Atopo     | 2               | 3                 | 0.667           | 3                    | 0.667           |
| <i>Calyptomyrmex_kaurus</i>         | Calypto   | 2               | 37                | 0.054           | 37                   | 0.054           |
| <i>Calyptomyrmex_MM01</i>           | Calypto   | 2               | 37                | 0.054           | 37                   | 0.054           |
| <i>Cardiocondyla_mauritanica</i>    | Cardio    | 3               | 72                | 0.042           | 75                   | 0.040           |
| <i>Cardiocondyla_MY01</i>           | Cardio    | 3               | 72                | 0.042           | 75                   | 0.040           |
| <i>Cardiocondyla_thoracica</i>      | Cardio    | 3               | 72                | 0.042           | 75                   | 0.040           |
| <i>Carebara_AU01</i>                | Carebara  | 6               | 202               | 0.030           | 235                  | 0.026           |
| <i>Carebara_affinis</i>             | Carebara  | 6               | 202               | 0.030           | 235                  | 0.026           |
| <i>Carebara_pygmaea</i>             | Carebara  | 6               | 202               | 0.030           | 235                  | 0.026           |
| <i>Carebara_jajoby</i>              | Carebara  | 6               | 202               | 0.030           | 235                  | 0.026           |
| <i>Carebara_urichi</i>              | Carebara  | 6               | 202               | 0.030           | 235                  | 0.026           |
| <i>Carebara_vidua</i>               | Carebara  | 6               | 202               | 0.030           | 235                  | 0.026           |
| <i>Cataulacus_ebrardi</i>           | Catau     | 4               | 65                | 0.062           | 65                   | 0.062           |
| <i>Cataulacus_guineensis</i>        | Catau     | 4               | 65                | 0.062           | 65                   | 0.062           |
| <i>Cataulacus_hispidulus</i>        | Catau     | 4               | 65                | 0.062           | 65                   | 0.062           |
| <i>Cataulacus_muticus</i>           | Catau     | 4               | 65                | 0.062           | 65                   | 0.062           |
| <i>Crematogaster_aberrans</i>       | Cremato   | 17              | 496               | 0.034           | 766                  | 0.022           |
| <i>Crematogaster_acuta</i>          | Cremato   | 17              | 496               | 0.034           | 766                  | 0.022           |
| <i>Crematogaster_alafara</i>        | Cremato   | 17              | 496               | 0.034           | 766                  | 0.022           |
| <i>Crematogaster_rogenhoferi_cf</i> | Cremato   | 17              | 496               | 0.034           | 766                  | 0.022           |
| <i>Crematogaster_emeryana</i>       | Cremato   | 17              | 496               | 0.034           | 766                  | 0.022           |
| <i>Crematogaster_flavitarisis</i>   | Cremato   | 17              | 496               | 0.034           | 766                  | 0.022           |
| <i>Crematogaster_fruhstorferi</i>   | Cremato   | 17              | 496               | 0.034           | 766                  | 0.022           |
| <i>Crematogaster_kelleri</i>        | Cremato   | 17              | 496               | 0.034           | 766                  | 0.022           |
| <i>Crematogaster_longispina</i>     | Cremato   | 17              | 496               | 0.034           | 766                  | 0.022           |
| <i>Crematogaster_lotti</i>          | Cremato   | 17              | 496               | 0.034           | 766                  | 0.022           |
| <i>Crematogaster_macracantha</i>    | Cremato   | 17              | 496               | 0.034           | 766                  | 0.022           |
| <i>Crematogaster_malala</i>         | Cremato   | 17              | 496               | 0.034           | 766                  | 0.022           |
| <i>Crematogaster_meijerei</i>       | Cremato   | 17              | 496               | 0.034           | 766                  | 0.022           |
| <i>Crematogaster_modiglianii</i>    | Cremato   | 17              | 496               | 0.034           | 766                  | 0.022           |

|                                      | <b>Clade</b> | <b>Species<br/>sampled</b> | <b>Species<br/>described</b> | <b>Sample<br/>fraction</b> | <b>Species +<br/>subspecies</b> | <b>Sample<br/>fraction</b> |
|--------------------------------------|--------------|----------------------------|------------------------------|----------------------------|---------------------------------|----------------------------|
| <i>Crematogaster_MM02</i>            | Cremato      | 17                         | 496                          | 0.034                      | 766                             | 0.022                      |
| <i>Crematogaster_sordidula</i>       | Cremato      | 17                         | 496                          | 0.034                      | 766                             | 0.022                      |
| <i>Crematogaster_telolafy</i>        | Cremato      | 17                         | 496                          | 0.034                      | 766                             | 0.022                      |
| <i>Cyphoidris_exalta</i>             | Cypho        | 1                          | 4                            | 0.25                       | 4                               | 0.250                      |
| <i>Dacatria_templaris</i>            | Daca         | 1                          | 1                            | 1                          | 1                               | 1.000                      |
| <i>Dacatinops_cirrosus</i>           | Daceti       | 2                          | 7                            | 0.29                       | 7                               | 0.286                      |
| <i>Dacatinops_ignotus_cf</i>         | Daceti       | 2                          | 7                            | 0.29                       | 7                               | 0.286                      |
| <i>Dicroaspis_KM01</i>               | Dicro        | 1                          | 2                            | 0.5                        | 2                               | 0.500                      |
| <i>Dilobocondyla_borneensis_cf</i>   | Dilobo       | 3                          | 19                           | 0.16                       | 21                              | 0.143                      |
| <i>Dilobocondyla_MM01</i>            | Dilobo       | 3                          | 19                           | 0.16                       | 21                              | 0.143                      |
| <i>Dilobocondyla_MY01</i>            | Dilobo       | 3                          | 19                           | 0.16                       | 19                              | 0.158                      |
| <i>Diplomorium_longipenne</i>        | Diplo        | 1                          | 1                            | 1.00                       | 1                               | 1.000                      |
| <i>Eutetramorium_mocquerysi</i>      | Eutetra      | 1                          | 3                            | 0.33                       | 3                               | 0.333                      |
| <i>Formicoxenus_diversipilosus</i>   | Formico      | 1                          | 7                            | 0.14                       | 7                               | 0.143                      |
| <i>Gauromyrmex_acanthinus</i>        | Gauro        | 1                          | 2                            | 0.50                       | 2                               | 0.500                      |
| <i>Harpagoxenus_sublaevis</i>        | Harpago      | 1                          | 3                            | 0.33                       | 3                               | 0.333                      |
| <i>Huberia_brownii</i>               | Huberia      | 2                          | 2                            | 1.00                       | 2                               | 1.000                      |
| <i>Huberia_striata</i>               | Huberia      | 2                          | 2                            | 1.00                       | 2                               | 1.000                      |
| <i>Indomyrma_dasyppyx</i>            | Indomy       | 1                          | 2                            | 0.50                       | 2                               | 0.500                      |
| <i>Kartidris_sparsipila</i>          | Kartidris    | 1                          | 6                            | 0.17                       | 6                               | 0.167                      |
| <i>Leptothorax_muscorum_complex</i>  | Lepto        | 1                          | 19                           | 0.05                       | 21                              | 0.048                      |
| <i>Liomyrmex_gestroi</i>             | Liomy        | 1                          | 1                            | 1.00                       | 1                               | 1.000                      |
| <i>Lophomyrmex_ambiguus</i>          | Lopho        | 2                          | 13                           | 0.15                       | 13                              | 0.154                      |
| <i>Lophomyrmex_bedoti_cf</i>         | Lopho        | 2                          | 13                           | 0.15                       | 13                              | 0.154                      |
| <i>Ancyridris_polyrhachioides_nr</i> | Lordo        | 16                         | 41                           | 0.390                      | 41                              | 0.390                      |
| <i>Lasiomyrma_IN01_1</i>             | Lordo        | 16                         | 41                           | 0.39                       | 41                              | 0.390                      |
| <i>Lasiomyrma_IN01_2</i>             | Lordo        | 16                         | 41                           | 0.39                       | 41                              | 0.390                      |
| <i>Lordomyrma_AU02</i>               | Lordo        | 16                         | 41                           | 0.39                       | 41                              | 0.390                      |
| <i>Lordomyrma_AU03</i>               | Lordo        | 16                         | 41                           | 0.39                       | 41                              | 0.390                      |
| <i>Lordomyrma_AU1</i>                | Lordo        | 16                         | 41                           | 0.39                       | 41                              | 0.390                      |
| <i>Lordomyrma_MM01</i>               | Lordo        | 16                         | 41                           | 0.39                       | 41                              | 0.390                      |
| <i>Lordomyrma_MM02</i>               | Lordo        | 16                         | 41                           | 0.39                       | 41                              | 0.390                      |
| <i>Lordomyrma_PG01</i>               | Lordo        | 16                         | 41                           | 0.39                       | 41                              | 0.390                      |
| <i>Lordomyrma_PG02</i>               | Lordo        | 16                         | 41                           | 0.39                       | 41                              | 0.390                      |
| <i>Lordomyrma_PG03</i>               | Lordo        | 16                         | 41                           | 0.39                       | 41                              | 0.390                      |
| <i>Lordomyrma_PG04</i>               | Lordo        | 16                         | 41                           | 0.39                       | 41                              | 0.390                      |
| <i>Lordomyrma_bhutanensis_cf</i>     | Lordo        | 16                         | 41                           | 0.39                       | 41                              | 0.390                      |
| <i>Lordomyrma_desupra</i>            | Lordo        | 16                         | 41                           | 0.39                       | 41                              | 0.390                      |
| <i>Lordomyrma_epinotalis</i>         | Lordo        | 16                         | 41                           | 0.39                       | 41                              | 0.390                      |

|                                 | <b>Clade</b> | <b>Species<br/>sampled</b> | <b>Species<br/>described</b> | <b>Sample<br/>fraction</b> | <b>Species +<br/>subspecies</b> | <b>Sample<br/>fraction</b> |
|---------------------------------|--------------|----------------------------|------------------------------|----------------------------|---------------------------------|----------------------------|
| <i>Propodilobus pingorum</i>    | Lordo        | 16                         | 41                           | 0.39                       | 41                              | 0.390                      |
| <i>Malagidris belti</i>         | Mala         | 2                          | 6                            | 0.33                       | 6                               | 0.333                      |
| <i>Malagidris jugum</i>         | Mala         | 2                          | 6                            | 0.33                       | 6                               | 0.333                      |
| <i>Mayriella MM01</i>           | Mayri        | 2                          | 9                            | 0.22                       | 9                               | 0.222                      |
| <i>Mayriella ebbei</i>          | Mayri        | 2                          | 9                            | 0.22                       | 9                               | 0.222                      |
| <i>Melissotarsus insularis</i>  | Melisso      | 1                          | 4                            | 0.25                       | 4                               | 0.250                      |
| <i>Meranoplus castaneus</i>     | Merano       | 5                          | 90                           | 0.06                       | 90                              | 0.056                      |
| <i>Meranoplus fenestrata</i>    | Merano       | 5                          | 90                           | 0.06                       | 90                              | 0.056                      |
| <i>Meranoplus mayri</i>         | Merano       | 5                          | 90                           | 0.06                       | 90                              | 0.056                      |
| <i>Meranoplus mcarthuri</i>     | Merano       | 5                          | 90                           | 0.06                       | 90                              | 0.056                      |
| <i>Meranoplus radamae</i>       | Merano       | 5                          | 90                           | 0.06                       | 90                              | 0.056                      |
| <i>Metapone PG01</i>            | Metapo       | 2                          | 28                           | 0.07                       | 28                              | 0.071                      |
| <i>Metapone madagascarica</i>   | Metapo       | 2                          | 28                           | 0.07                       | 28                              | 0.071                      |
| <i>Myrmecina PG01</i>           | Myrmecina    | 4                          | 53                           | 0.08                       | 54                              | 0.074                      |
| <i>Myrmecina americana</i>      | Myrmecina    | 4                          | 53                           | 0.08                       | 54                              | 0.074                      |
| <i>Myrmecina graminicola</i>    | Myrmecina    | 4                          | 53                           | 0.08                       | 54                              | 0.074                      |
| <i>Myrmecina striata</i>        | Myrmecina    | 4                          | 53                           | 0.08                       | 54                              | 0.074                      |
| <i>Nesomyrmex hafahafa</i>      | Nesomyrmex   | 5                          | 81                           | 0.06                       | 82                              | 0.061                      |
| <i>Nesomyrmex brunneus</i>      | Nesomyrmex   | 5                          | 81                           | 0.06                       | 82                              | 0.061                      |
| <i>Nesomyrmex echinatinodis</i> | Nesomyrmex   | 5                          | 81                           | 0.06                       | 82                              | 0.061                      |
| <i>Nesomyrmex madecassus</i>    | Nesomyrmex   | 5                          | 81                           | 0.06                       | 82                              | 0.061                      |
| <i>Nesomyrmex wilda</i>         | Nesomyrmex   | 5                          | 81                           | 0.06                       | 82                              | 0.061                      |
| <i>Ocymyrmex celer</i>          | Ocy          | 4                          | 34                           | 0.12                       | 34                              | 0.118                      |
| <i>Ocymyrmex fortior cf</i>     | Ocy          | 4                          | 34                           | 0.12                       | 34                              | 0.118                      |
| <i>Ocymyrmex nitidulus</i>      | Ocy          | 4                          | 34                           | 0.12                       | 34                              | 0.118                      |
| <i>Ocymyrmex picardi</i>        | Ocy          | 4                          | 34                           | 0.12                       | 34                              | 0.118                      |
| <i>Paratopula TH01</i>          | Para         | 1                          | 12                           | 0.08                       | 12                              | 0.083                      |
| <i>Perissomyrmex snyderi</i>    | Perisso      | 1                          | 6                            | 0.17                       | 6                               | 0.167                      |
| <i>Podomyrma adelaidae</i>      | Podo         | 4                          | 52                           | 0.08                       | 62                              | 0.065                      |
| <i>Podomyrma laevifrons</i>     | Podo         | 4                          | 52                           | 0.08                       | 62                              | 0.065                      |
| <i>Podomyrma ruficeps</i>       | Podo         | 4                          | 52                           | 0.08                       | 62                              | 0.065                      |
| <i>Podomyrma silvicola</i>      | Podo         | 4                          | 52                           | 0.08                       | 62                              | 0.065                      |
| <i>Poecilomyrma myrmecodiae</i> | Poecilo      | 1                          | 2                            | 0.50                       | 2                               | 0.500                      |
| <i>Pristomyrmex orbiceps</i>    | Pristo       | 3                          | 59                           | 0.05                       | 59                              | 0.051                      |
| <i>Pristomyrmex punctatus</i>   | Pristo       | 3                          | 59                           | 0.05                       | 59                              | 0.051                      |
| <i>Pristomyrmex rigidus</i>     | Pristo       | 3                          | 59                           | 0.05                       | 59                              | 0.051                      |
| <i>Proatta butteli</i>          | Proatta      | 1                          | 1                            | 1.00                       | 1                               | 1.000                      |
| <i>Recurvidris MM01</i>         | Recurvi      | 2                          | 11                           | 0.18                       | 11                              | 0.182                      |
| <i>Recurvidris TH01</i>         | Recurvi      | 2                          | 11                           | 0.18                       | 11                              | 0.182                      |

|                                    | <b>Clade</b> | <b>Species<br/>sampled</b> | <b>Species<br/>described</b> | <b>Sample<br/>fraction</b> | <b>Species +<br/>subspecies</b> | <b>Sample<br/>fraction</b> |
|------------------------------------|--------------|----------------------------|------------------------------|----------------------------|---------------------------------|----------------------------|
| <i>Rhopalomastix_rothneyi</i>      | Rhopalo      | 1                          | 6                            | 0.17                       | 8                               | 0.125                      |
| <i>Romblonella_elysii</i>          | Romblo       | 2                          | 10                           | 0.20                       | 10                              | 0.200                      |
| <i>Romblonella_scrobifera</i>      | Romblo       | 2                          | 10                           | 0.20                       | 10                              | 0.200                      |
| <i>Rostromyrmex_pasohensis</i>     | Rostro       | 1                          | 1                            | 1.00                       | 1                               | 1.000                      |
| <i>Rotastruma_recava</i>           | Rota         | 2                          | 2                            | 1.00                       | 2                               | 1.000                      |
| <i>Rotastruma_stenoceps</i>        | Rota         | 2                          | 2                            | 1.00                       | 2                               | 1.000                      |
| <i>Royidris_longiseta</i>          | Royidris     | 2                          | 15                           | 0.13                       | 15                              | 0.133                      |
| <i>Royidris_notorthotenes</i>      | Royidris     | 2                          | 15                           | 0.13                       | 15                              | 0.133                      |
| <i>Stereomyrmex_horni</i>          | Stereo       | 1                          | 3                            | 0.33                       | 3                               | 0.333                      |
| <i>Temnothorax_bernardi</i>        | Temno        | 4                          | 394                          | 0.01                       | 435                             | 0.009                      |
| <i>Temnothorax_kutteri</i>         | Temno        | 4                          | 394                          | 0.01                       | 435                             | 0.009                      |
| <i>Temnothorax_poeyi</i>           | Temno        | 4                          | 394                          | 0.01                       | 435                             | 0.009                      |
| <i>Temnothorax_rugatulus</i>       | Temno        | 4                          | 394                          | 0.01                       | 435                             | 0.009                      |
| <i>Terataner_MG02</i>              | Tera         | 3                          | 14                           | 0.21                       | 14                              | 0.214                      |
| <i>Terataner_MG27</i>              | Tera         | 3                          | 14                           | 0.21                       | 14                              | 0.214                      |
| <i>Terataner_bottegoi</i>          | Tera         | 3                          | 14                           | 0.21                       | 14                              | 0.214                      |
| <i>Tetheamyрма_subspongia</i>      | Tethea       | 1                          | 1                            | 1.00                       | 1                               | 1.000                      |
| <i>Strongylognathus_testaceus</i>  | Tetra        | 12                         | 594                          | 0.02                       | 609                             | 0.020                      |
| <i>Tetramorium_CF01</i>            | Tetra        | 12                         | 594                          | 0.02                       | 609                             | 0.020                      |
| <i>Tetramorium_MG125</i>           | Tetra        | 12                         | 594                          | 0.02                       | 609                             | 0.020                      |
| <i>Tetramorium_atratulum</i>       | Tetra        | 12                         | 594                          | 0.02                       | 609                             | 0.020                      |
| <i>Tetramorium_immigrans</i>       | Tetra        | 12                         | 594                          | 0.02                       | 609                             | 0.020                      |
| <i>Tetramorium_kutteri</i>         | Tetra        | 12                         | 594                          | 0.02                       | 609                             | 0.020                      |
| <i>Tetramorium_severini</i>        | Tetra        | 12                         | 594                          | 0.02                       | 609                             | 0.020                      |
| <i>Tetramorium_spinosum</i>        | Tetra        | 12                         | 594                          | 0.02                       | 609                             | 0.020                      |
| <i>Tetramorium_taylori</i>         | Tetra        | 12                         | 594                          | 0.02                       | 609                             | 0.020                      |
| <i>Tetramorium_transversinodis</i> | Tetra        | 12                         | 594                          | 0.02                       | 609                             | 0.020                      |
| <i>Tetramorium_validiusculum</i>   | Tetra        | 12                         | 594                          | 0.02                       | 609                             | 0.020                      |
| <i>Tetramorium_venator</i>         | Tetra        | 12                         | 594                          | 0.02                       | 609                             | 0.020                      |
| <i>Trichomyrmex_criniceps</i>      | Tricho       | 3                          | 24                           | 0.13                       | 28                              | 0.107                      |
| <i>Trichomyrmex_destructor</i>     | Tricho       | 3                          | 24                           | 0.13                       | 28                              | 0.107                      |
| <i>Trichomyrmex_robustior</i>      | Tricho       | 3                          | 24                           | 0.13                       | 28                              | 0.107                      |
| <i>Vitsika_brevis</i>              | Vitsika      | 3                          | 16                           | 0.19                       | 16                              | 0.188                      |
| <i>Vitsika_producta</i>            | Vitsika      | 3                          | 16                           | 0.19                       | 16                              | 0.188                      |
| <i>Vitsika_suspicax</i>            | Vitsika      | 3                          | 16                           | 0.19                       | 16                              | 0.188                      |
| <i>Vollenhovia_MM01</i>            | Vollenho     | 3                          | 59                           | 0.05                       | 77                              | 0.039                      |
| <i>Vollenhovia_emeryi</i>          | Vollenho     | 3                          | 59                           | 0.05                       | 77                              | 0.039                      |
| <i>Vollenhovia_rufiventris</i>     | Vollenho     | 3                          | 59                           | 0.05                       | 77                              | 0.039                      |
| <i>Vombisidris_bilongrudi</i>      | Vombi        | 1                          | 17                           | 0.06                       | 17                              | 0.059                      |

|                              | <b>Clade</b> | <b>Species<br/>sampled</b> | <b>Species<br/>described</b> | <b>Sample<br/>fraction</b> | <b>Species +<br/>subspecies</b> | <b>Sample<br/>fraction</b> |
|------------------------------|--------------|----------------------------|------------------------------|----------------------------|---------------------------------|----------------------------|
| <i>Xenomyrmex_floridanus</i> | Xeno         | 2                          | 4                            | 0.50                       | 5                               | 0.400                      |
| <i>Xenomyrmex_stollii</i>    | Xeno         | 2                          | 4                            | 0.50                       | 5                               | 0.400                      |

**Table S6: Library preparations and UCE sequence-capture statistics.** Table listing, for each taxon included in the study, the pre-library preparation DNA concentration, the post-library preparation DNA concentration, the total raw read count, the total number of assembled contigs, their average coverage (X) and mean length, the number of assembled UCE contigs and their mean length and mean coverage, and the number of UCE loci. The UCE reads on target are the number of reads aligning to UCE loci/total reads.

| Genus                 | Species                   | Pre-library conc. (ng/uL) | Post-library conc. (ng/uL) | Total read count | Total contigs (post-trim) |                   |             | Contigs aligned to UCE loci |             |                   | Reads on target |
|-----------------------|---------------------------|---------------------------|----------------------------|------------------|---------------------------|-------------------|-------------|-----------------------------|-------------|-------------------|-----------------|
|                       |                           |                           |                            |                  | Count                     | Avg. coverage (x) | Avg. length | Locus count                 | Avg. length | Avg. coverage (x) |                 |
| <i>Acanthomyrmex</i>  | <i>ferox</i>              | 0.33                      | 32.4                       | 4,319,207        | 98123                     | 8.1               | 353         | 2325                        | 736         | 49.2              | 0.28            |
| <i>Acanthoponera</i>  | <i>minor</i>              | 1.33                      | 29.4                       | 1,246,324        | 20513                     | 9.4               | 382         | 2233                        | 705         | 29.1              | 0.56            |
| <i>Adlerzia</i>       | <i>froggatti</i>          | 1.61                      | 105.0                      | 921,263          | 13808                     | 11.4              | 417         | 2207                        | 578         | 22.0              | 0.47            |
| <i>Ancyridris</i>     | <i>polyrhachioides_nr</i> | 0.74                      | 29.7                       | 1,606,400        | 24080                     | 12.6              | 344         | 2166                        | 428         | 40.9              | 0.37            |
| <i>Aphaenogaster</i>  | <i>swammerdami</i>        | 1.73                      | 12.6                       | 4,236,648        | 159348                    | 6.8               | 330         | 2374                        | 989         | 85.9              | 0.44            |
| <i>Aretidris</i>      | <i>buenaventei</i>        | 2.30                      | 32.5                       | 1,301,584        | 24272                     | 8.0               | 330         | 2231                        | 644         | 30.7              | 0.58            |
| <i>Atopomyrmex</i>    | <i>cryptoceroides</i>     | 0.69                      | 24.4                       | 4,909,037        | 90065                     | 10.9              | 283         | 2311                        | 419         | 121.9             | 0.39            |
| <i>Atopomyrmex</i>    | <i>mocquerysi</i>         | 1.54                      | 45.2                       | 2,331,188        | 80134                     | 6.6               | 312         | 2323                        | 757         | 47.1              | 0.42            |
| <i>Calypatomyrmex</i> | <i>kaurus</i>             | 0.16                      | 30.7                       | 2,222,160        | 49291                     | 9.5               | 343         | 2258                        | 598         | 40.6              | 0.34            |
| <i>Calypatomyrmex</i> | <i>MM01</i>               | 0.67                      | 19.5                       | 4,672,932        | 132526                    | 6.6               | 331         | 2310                        | 915         | 71.5              | 0.40            |
| <i>Cardiocondyla</i>  | <i>mauritanica</i>        | 0.22                      | 55.0                       | 3,186,147        | 141554                    | 6.4               | 316         | 2334                        | 781         | 44.4              | 0.24            |
| <i>Cardiocondyla</i>  | <i>MY01</i>               | <0.05                     | 15.3                       | 1,337,789        | 29843                     | 7.4               | 328         | 2241                        | 665         | 30.2              | 0.51            |
| <i>Cardiocondyla</i>  | <i>thoracica</i>          | 0.90                      | 34.1                       | 3,245,465        | 85753                     | 6.9               | 449         | 2292                        | 768         | 48.7              | 0.33            |
| <i>Carebara</i>       | <i>affinis</i>            | 0.27                      | 47.8                       | 1,449,851        | 35789                     | 6.4               | 336         | 2332                        | 791         | 27.0              | 0.49            |
| <i>Carebara</i>       | <i>pygmaea</i>            | 0.45                      | 18.0                       | 836,447          | 7808                      | 9.2               | 606         | 2164                        | 582         | 17.4              | 0.37            |
| <i>Carebara</i>       | <i>AU01</i>               | 0.42                      | 19.3                       | 2,288,628        | 87637                     | 5.6               | 316         | 2336                        | 823         | 28.2              | 0.31            |
| <i>Carebara</i>       | <i>jajoby</i>             | 1.33                      | 37.9                       | 5,088,658        | 228374                    | 6.9               | 348         | 2381                        | 967         | 93.9              | 0.32            |
| <i>Carebara</i>       | <i>urichi</i>             | 0.72                      | 32.7                       | 2,059,117        | 54493                     | 6.9               | 330         | 2335                        | 815         | 32.4              | 0.40            |
| <i>Carebara</i>       | <i>vidua</i>              | 0.36                      | 18.9                       | 1,949,113        | 71959                     | 5.6               | 294         | 2365                        | 773         | 35.7              | 0.45            |
| <i>Cataulacus</i>     | <i>ebrardi</i>            | 1.27                      | 69.4                       | 2,473,846        | 79335                     | 7.0               | 334         | 2267                        | 747         | 33.4              | 0.30            |
| <i>Cataulacus</i>     | <i>guineensis</i>         | 0.98                      | 8.7                        | 5,201,008        | 123651                    | 8.2               | 332         | 2251                        | 496         | 105.5             | 0.36            |
| <i>Cataulacus</i>     | <i>hispidulus</i>         | 14.60                     | 81.0                       | 925,846          | 17447                     | 8.0               | 366         | 2153                        | 647         | 20.6              | 0.53            |
| <i>Cataulacus</i>     | <i>muticus</i>            | 5.51                      | 25.9                       | 4,746,946        | 128497                    | 6.5               | 413         | 2286                        | 883         | 85.1              | 0.44            |
| <i>Crematogaster</i>  | <i>aberrans</i>           | 1.00                      | 8.8                        | 1,532,621        | 31007                     | 6.8               | 328         | 2352                        | 877         | 33.8              | 0.65            |
| <i>Crematogaster</i>  | <i>acuta</i>              | 1.63                      | 40.2                       | 2,504,077        | 66797                     | 8.3               | 320         | 2362                        | 707         | 46.8              | 0.38            |
| <i>Crematogaster</i>  | <i>alafara</i>            | 2.07                      | 16.1                       | 1,467,135        | 24178                     | 8.6               | 363         | 2312                        | 787         | 35.1              | 0.64            |
| <i>Crematogaster</i>  | <i>rogenhoferi_cf</i>     | 0.07                      | 6.2                        | 1,625,664        | 37041                     | 8.4               | 338         | 2268                        | 535         | 26.4              | 0.32            |
| <i>Crematogaster</i>  | <i>emeryana</i>           | 0.47                      | 62.5                       | 1,909,414        | 56465                     | 6.7               | 331         | 2306                        | 746         | 29.7              | 0.38            |

| Genus                | Species                 | Pre-library conc. (ng/uL) | Post-library conc. (ng/uL) | Total read count | Count  | Avg. coverage (x) | Avg. length | Locus count | Avg. length | Avg. coverage (x) | Reads on target |
|----------------------|-------------------------|---------------------------|----------------------------|------------------|--------|-------------------|-------------|-------------|-------------|-------------------|-----------------|
| <i>Crematogaster</i> | <i>flavitaris</i>       | 0.42                      | 15.2                       | 1,376,967        | 20709  | 8.0               | 370         | 2258        | 816         | 25.4              | 0.61            |
| <i>Crematogaster</i> | <i>fruhstorferi</i>     | 1.24                      | 26.5                       | 488,494          | 6123   | 8.7               | 468         | 2114        | 692         | 14.9              | 0.74            |
| <i>Crematogaster</i> | <i>kelleri</i>          | 4.04                      | 26.8                       | 3,602,889        | 104057 | 9.0               | 312         | 2358        | 709         | 82.4              | 0.40            |
| <i>Crematogaster</i> | <i>longispina</i>       | 1.13                      | 62.6                       | 4,032,330        | 136260 | 6.2               | 375         | 2312        | 1000        | 54.2              | 0.35            |
| <i>Crematogaster</i> | <i>lotti</i>            | 1.09                      | 12.8                       | 1,128,292        | 17941  | 8.4               | 353         | 2273        | 666         | 24.1              | 0.56            |
| <i>Crematogaster</i> | <i>macracantha</i>      | 0.69                      | 10.2                       | 1,800,794        | 41905  | 7.3               | 331         | 2357        | 739         | 38.8              | 0.54            |
| <i>Crematogaster</i> | <i>malala</i>           | 0.26                      | 8.8                        | 2,594,077        | 70278  | 6.3               | 318         | 2354        | 839         | 41.4              | 0.45            |
| <i>Crematogaster</i> | <i>meijerei</i>         | 0.35                      | 10.5                       | 3,564,815        | 117012 | 7.9               | 309         | 2399        | 626         | 68.6              | 0.32            |
| <i>Crematogaster</i> | <i>modiglianii</i>      | 3.26                      | 66.6                       | 4,423,145        | 211323 | 6.3               | 350         | 2302        | 1049        | 48.2              | 0.24            |
| <i>Crematogaster</i> | <i>MM02</i>             | 0.35                      | 24.6                       | 1,133,515        | 20128  | 8.2               | 355         | 2273        | 735         | 27.1              | 0.61            |
| <i>Crematogaster</i> | <i>sordidula</i>        | 0.47                      | 45.5                       | 1,572,391        | 39278  | 7.2               | 322         | 2316        | 714         | 28.9              | 0.46            |
| <i>Crematogaster</i> | <i>telolafy</i>         | 0.13                      | 18.6                       | 1,338,718        | 26057  | 8.7               | 350         | 2313        | 636         | 30.5              | 0.51            |
| <i>Cyphoidris</i>    | <i>exalta</i>           | 0.42                      | 45.5                       | 3,547,533        | 78525  | 9.2               | 335         | 2309        | 678         | 45.1              | 0.27            |
| <i>Dacatria</i>      | <i>templaris</i>        | 2.97                      | 39.3                       | 2,105,316        | 21761  | 11.2              | 399         | 2221        | 640         | 25.4              | 0.40            |
| <i>Dacatinops</i>    | <i>cirrosus</i>         | <0.05                     | 1.3                        | 31,309           | 251    | 4.0               | 235         | 140         | 236         | 5.1               | 0.67            |
| <i>Dacatinops</i>    | <i>ignotus_cf</i>       | <0.05                     | 9.4                        | 2,452,194        | 58891  | 7.5               | 309         | 2211        | 617         | 33.2              | 0.32            |
| <i>Dicroaspis</i>    | <i>KM01</i>             | 0.10                      | 38.9                       | 2,234,914        | 39770  | 10.8              | 337         | 2259        | 619         | 37.1              | 0.37            |
| <i>Dilobocondyla</i> | <i>borneensis_cf</i>    | 1.48                      | 58.3                       | 2,142,120        | 45139  | 9.6               | 342         | 2339        | 691         | 32.6              | 0.34            |
| <i>Dilobocondyla</i> | <i>MM01</i>             | 0.13                      | 8.5                        | 1,604,103        | 23001  | 12.3              | 372         | 2297        | 653         | 38.9              | 0.50            |
| <i>Dilobocondyla</i> | <i>MY01</i>             | 0.47                      | 13.2                       | 1,330,998        | 18892  | 12.9              | 387         | 2143        | 430         | 22.4              | 0.26            |
| <i>Diplomorium</i>   | <i>longipenne</i>       | 0.43                      | 41.6                       | 4,623,772        | 159778 | 7.3               | 316         | 2391        | 773         | 69.8              | 0.31            |
| <i>Eutetramorium</i> | <i>mocquerysi</i>       | 17.40                     | 68.2                       | 1,800,684        | 28379  | 10.6              | 333         | 2309        | 671         | 26.2              | 0.37            |
| <i>Formica</i>       | <i>moki</i>             | 17.50                     | 26.3                       | 2,322,700        | 55854  | 7.9               | 331         | 2275        | 739         | 43.2              | 0.44            |
| <i>Formicoxenus</i>  | <i>diversipilosus</i>   | 0.63                      | 24.7                       | 3,878,281        | 96522  | 9.0               | 334         | 2340        | 695         | 51.5              | 0.29            |
| <i>Gauromyrmex</i>   | <i>acanthinus</i>       | <0.05                     | 20.0                       | 1,878,437        | 58797  | 6.7               | 307         | 2315        | 676         | 34.4              | 0.39            |
| <i>Harpagoxenus</i>  | <i>sublaevis</i>        | 3.44                      | 35.4                       | 2,315,188        | 59807  | 9.3               | 338         | 2291        | 690         | 31.4              | 0.28            |
| <i>Huberia</i>       | <i>brounii</i>          | 0.23                      | 48.4                       | 2,009,135        | 54253  | 7.1               | 338         | 2296        | 741         | 30.0              | 0.36            |
| <i>Huberia</i>       | <i>striata</i>          | <0.05                     | 1.6                        | 150,006          | 1941   | 13.5              | 282         | 1209        | 269         | 15.3              | 0.68            |
| <i>Indomyrma</i>     | <i>dasyppyx</i>         | <0.05                     | 4.6                        | 1,450,508        | 17395  | 11.8              | 313         | 2224        | 405         | 37.3              | 0.51            |
| <i>Kartidris</i>     | <i>sparsipila</i>       | 2.01                      | 23.0                       | 1,300,797        | 16651  | 10.3              | 367         | 2170        | 630         | 18.9              | 0.43            |
| <i>Lasiomyrma</i>    | <i>IN01_1</i>           | <0.05                     | 3.6                        | 3,422,473        | 55818  | 9.3               | 318         | 1944        | 328         | 30.2              | 0.14            |
| <i>Lasiomyrma</i>    | <i>IN01_2</i>           | <0.05                     | 3.8                        | 2,710,208        | 45118  | 8.6               | 314         | 2017        | 341         | 29.2              | 0.20            |
| <i>Leptothorax</i>   | <i>muscorum_complex</i> | 0.62                      | 66.2                       | 1,503,748        | 28753  | 9.5               | 375         | 2210        | 727         | 23.8              | 0.40            |
| <i>Liomyrmex</i>     | <i>gestroi</i>          | 0.42                      | 17.0                       | 3,316,434        | 129997 | 7.0               | 300         | 2369        | 641         | 70.5              | 0.33            |

| Genus                | Species               | Pre-library conc. (ng/uL) | Post-library conc. (ng/uL) | Total read count | Count  | Avg. coverage (x) | Avg. length | Locus count | Avg. length | Avg. coverage (x) | Reads on target |
|----------------------|-----------------------|---------------------------|----------------------------|------------------|--------|-------------------|-------------|-------------|-------------|-------------------|-----------------|
| <i>Lophomyrmex</i>   | <i>ambiguus</i>       | 0.45                      | 23.7                       | 3,157,064        | 72574  | 9.7               | 305         | 2382        | 550         | 71.3              | 0.41            |
| <i>Lordomyrma</i>    | <i>AU01</i>           | 0.06                      | 9.8                        | 2,231,511        | 40219  | 11.2              | 331         | 2340        | 469         | 60.0              | 0.44            |
| <i>Lophomyrmex</i>   | <i>bedoti_cf</i>      | 1.15                      | 23.1                       | 2,057,417        | 42408  | 7.0               | 330         | 2355        | 916         | 49.2              | 0.69            |
| <i>Lordomyrma</i>    | <i>AU02</i>           | 0.14                      | 14.8                       | 4,788,242        | 89204  | 8.0               | 305         | 2378        | 682         | 97.0              | 0.49            |
| <i>Lordomyrma</i>    | <i>AU03</i>           | 0.48                      | 31.6                       | 1,326,318        | 11686  | 24.1              | 330         | 2190        | 341         | 71.8              | 0.61            |
| <i>Lordomyrma</i>    | <i>bhutanensis_cf</i> | 1.50                      | 46.3                       | 2,354,886        | 62363  | 8.4               | 347         | 2312        | 662         | 35.8              | 0.32            |
| <i>Lordomyrma</i>    | <i>desupra</i>        | 0.61                      | 84.8                       | 1,278,659        | 21114  | 10.1              | 373         | 2202        | 614         | 20.6              | 0.34            |
| <i>Lordomyrma</i>    | <i>epinotalis</i>     | <0.05                     | 0.3                        | 13,667           | 136    | 4.9               | 267         | 103         | 229         | 4.7               | 0.55            |
| <i>Lordomyrma</i>    | <i>MM01</i>           | <0.05                     | 1.6                        | 370,542          | 4865   | 12.5              | 352         | 2027        | 357         | 16.6              | 0.62            |
| <i>Lordomyrma</i>    | <i>MM02</i>           | <0.05                     | 5.2                        | 1,577,669        | 26006  | 10.2              | 351         | 2289        | 500         | 28.7              | 0.35            |
| <i>Lordomyrma</i>    | <i>PG02</i>           | 0.16                      | 7.5                        | 3,681,775        | 37466  | 9.2               | 311         | 2376        | 651         | 58.7              | 0.62            |
| <i>Lordomyrma</i>    | <i>PG01</i>           | 0.18                      | 21.2                       | 1,846,082        | 30158  | 11.9              | 321         | 2361        | 510         | 64.3              | 0.60            |
| <i>Lordomyrma</i>    | <i>PG03</i>           | <0.05                     | 1.4                        | 354,692          | 2303   | 13.9              | 301         | 761         | 244         | 13.0              | 0.26            |
| <i>Lordomyrma</i>    | <i>PG04</i>           | 0.20                      | 23.1                       | 5,845,581        | 118024 | 9.2               | 316         | 2330        | 520         | 102.7             | 0.34            |
| <i>Malagidris</i>    | <i>belti</i>          | 0.33                      | 77.0                       | 1,274,362        | 16387  | 13.9              | 436         | 2239        | 490         | 25.6              | 0.32            |
| <i>Malagidris</i>    | <i>jugum</i>          | 14.10                     | 63.9                       | 1,996,807        | 37709  | 9.8               | 336         | 2335        | 764         | 31.8              | 0.38            |
| <i>Manica</i>        | <i>bradleyi</i>       | 5.16                      | 20.8                       | 2,449,533        | 51473  | 9.0               | 330         | 2300        | 800         | 39.8              | 0.39            |
| <i>Mayriella</i>     | <i>ebbei</i>          | 1.59                      | 50.0                       | 3,128,344        | 133977 | 6.3               | 325         | 2345        | 867         | 46.7              | 0.32            |
| <i>Mayriella</i>     | <i>MM01</i>           | <0.05                     | 1.0                        | 78,818           | 1996   | 8.1               | 329         | 1666        | 344         | 8.9               | 0.94            |
| <i>Melissotarsus</i> | <i>insularis</i>      | 0.30                      | 41.7                       | 1,434,636        | 25114  | 11.1              | 396         | 2120        | 557         | 20.8              | 0.28            |
| <i>Meranoplus</i>    | <i>castaneus</i>      | 1.90                      | 31.5                       | 3,517,853        | 141198 | 7.0               | 317         | 2362        | 840         | 66.5              | 0.35            |
| <i>Meranoplus</i>    | <i>fenestrata</i>     | 1.79                      | 8.9                        | 4,869,847        | 109750 | 7.5               | 313         | 2360        | 896         | 118.6             | 0.62            |
| <i>Meranoplus</i>    | <i>mayri</i>          | 0.28                      | 26.0                       | 1,685,696        | 40829  | 7.5               | 296         | 2357        | 694         | 45.8              | 0.61            |
| <i>Meranoplus</i>    | <i>mcarthuri</i>      | 0.43                      | 2.3                        | 1,023,132        | 6795   | 19.7              | 282         | 1837        | 286         | 35.0              | 0.53            |
| <i>Meranoplus</i>    | <i>radamae</i>        | 1.20                      | 21.8                       | 3,536,589        | 51693  | 14.6              | 398         | 2139        | 524         | 51.3              | 0.20            |
| <i>Metapone</i>      | <i>madagascarica</i>  | 3.89                      | 49.9                       | 3,437,108        | 164799 | 5.9               | 321         | 2373        | 859         | 63.6              | 0.33            |
| <i>Metapone</i>      | <i>PG01</i>           | 0.58                      | 49.6                       | 1,114,359        | 21849  | 8.6               | 289         | 2256        | 564         | 38.6              | 0.67            |
| <i>Monomorium</i>    | <i>hanneli</i>        | 0.64                      | 21.2                       | 1,074,094        | 16663  | 9.9               | 357         | 2301        | 661         | 29.9              | 0.65            |
| <i>Myrmecina</i>     | <i>americana</i>      | 1.23                      | 46.3                       | 2,230,702        | 69283  | 7.1               | 345         | 2241        | 755         | 29.9              | 0.30            |
| <i>Myrmecina</i>     | <i>graminicola</i>    | 0.47                      | 74.5                       | 1,514,613        | 29599  | 7.9               | 561         | 2125        | 668         | 21.1              | 0.28            |
| <i>Myrmecina</i>     | <i>PG01</i>           | 7.41                      | 48.7                       | 1,581,323        | 37671  | 7.3               | 343         | 2243        | 756         | 28.9              | 0.44            |
| <i>Myrmecina</i>     | <i>striata</i>        | 0.58                      | 19.3                       | 693,384          | 10311  | 8.1               | 500         | 2125        | 636         | 18.8              | 0.57            |
| <i>Nesomyrmex</i>    | <i>echinatinodis</i>  | 0.46                      | 58.7                       | 1,185,213        | 18078  | 12.7              | 400         | 2061        | 606         | 15.3              | 0.26            |
| <i>Nesomyrmex</i>    | <i>madecassus</i>     | 5.67                      | 35.1                       | 3,751,245        | 127369 | 7.5               | 334         | 2339        | 870         | 44.5              | 0.27            |



| Genus                   | Species              | Pre-library conc. (ng/uL) | Post-library conc. (ng/uL) | Total read count | Count  | Avg. coverage (x) | Avg. length | Locus count | Avg. length | Avg. coverage (x) | Reads on target |
|-------------------------|----------------------|---------------------------|----------------------------|------------------|--------|-------------------|-------------|-------------|-------------|-------------------|-----------------|
| <i>Nesomyrmex</i>       | <i>hafahafa</i>      | 7.18                      | 40.6                       | 2,740,625        | 71981  | 8.2               | 317         | 2355        | 716         | 43.0              | 0.33            |
| <i>Nesomyrmex</i>       | <i>brunneus</i>      | 0.57                      | 55.4                       | 918,938          | 14751  | 9.8               | 350         | 2245        | 562         | 27.9              | 0.62            |
| <i>Nesomyrmex</i>       | <i>wilda</i>         | 1.73                      | 73.4                       | 1,104,806        | 15815  | 11.7              | 391         | 2183        | 570         | 22.8              | 0.38            |
| <i>Ocomyrmex</i>        | <i>celer</i>         | 0.30                      | 2.5                        | 1,184,523        | 8296   | 20.9              | 397         | 1931        | 309         | 51.9              | 0.55            |
| <i>Ocomyrmex</i>        | <i>fortior_cf</i>    | 4.76                      | 49.5                       | 2,180,869        | 16725  | 9.8               | 357         | 2098        | 533         | 26.5              | 0.47            |
| <i>Ocomyrmex</i>        | <i>nitidulus</i>     | 0.22                      | 4.6                        | 5,301,512        | 138397 | 7.7               | 318         | 2345        | 666         | 123.2             | 0.44            |
| <i>Ocomyrmex</i>        | <i>picardi</i>       | 0.90                      | 5.9                        | 688,219          | 4294   | 20.8              | 375         | 1551        | 277         | 31.0              | 0.48            |
| <i>Paratopula</i>       | <i>TH01</i>          | 0.37                      | 33.4                       | 3,617,205        | 110607 | 8.3               | 331         | 2347        | 728         | 56.1              | 0.30            |
| <i>Perissomyrmex</i>    | <i>snyderi</i>       | 5.27                      | 47.3                       | 850,808          | 6908   | 28.1              | 419         | 2074        | 504         | 19.2              | 0.41            |
| <i>Pheidole</i>         | <i>longispinosa</i>  | 8.38                      | 11.6                       | 4,986,691        | 207564 | 7.0               | 341         | 2391        | 964         | 95.6              | 0.37            |
| <i>Podomyrma</i>        | <i>adelaidae</i>     | 3.80                      | 19.3                       | 5,221,805        | 117306 | 7.5               | 323         | 2309        | 930         | 105.4             | 0.55            |
| <i>Podomyrma</i>        | <i>laevifrons</i>    | 0.10                      | 4.1                        | 728,124          | 5899   | 21.3              | 416         | 1185        | 257         | 24.3              | 0.23            |
| <i>Podomyrma</i>        | <i>ruficeps</i>      | 0.16                      | 10.2                       | 1,195,708        | 10522  | 21.5              | 451         | 2005        | 334         | 30.1              | 0.27            |
| <i>Podomyrma</i>        | <i>silvicola</i>     | 23.10                     | 45.3                       | 2,030,856        | 31563  | 9.4               | 422         | 2305        | 643         | 31.9              | 0.40            |
| <i>Poecilomyrma</i>     | <i>myrmecodiae</i>   | 5.07                      | 35.9                       | 4,395,494        | 197468 | 6.5               | 344         | 2375        | 1039        | 59.0              | 0.28            |
| <i>Pogonomyrmex</i>     | <i>imberbiculus</i>  | 9.11                      | 17.6                       | 796,065          | 8611   | 14.1              | 494         | 2167        | 615         | 21.9              | 0.50            |
| <i>Pristomyrmex</i>     | <i>orbiceps</i>      | 1.94                      | 33.8                       | 2,495,481        | 64439  | 8.9               | 339         | 2313        | 653         | 50.2              | 0.36            |
| <i>Pristomyrmex</i>     | <i>punctatus</i>     | 1.21                      | 59.9                       | 2,243,086        | 54604  | 7.9               | 352         | 2260        | 761         | 32.1              | 0.33            |
| <i>Pristomyrmex</i>     | <i>rigidus</i>       | 0.58                      | 7.4                        | 809,412          | 12856  | 8.6               | 400         | 2043        | 527         | 12.0              | 0.34            |
| <i>Proatta</i>          | <i>butтели</i>       | 0.53                      | 24.6                       | 1,485,700        | 27424  | 8.9               | 354         | 2355        | 788         | 39.4              | 0.63            |
| <i>Propodilobus</i>     | <i>pingorum</i>      | 0.44                      | 9.0                        | 2,853,619        | 60180  | 10.5              | 321         | 2305        | 561         | 36.7              | 0.22            |
| <i>Recurvidris</i>      | <i>MM01</i>          | 0.14                      | 15.6                       | 1,401,772        | 29659  | 7.4               | 322         | 2337        | 754         | 33.8              | 0.63            |
| <i>Recurvidris</i>      | <i>TH01</i>          | 0.12                      | 8.5                        | 1,402,364        | 28749  | 7.1               | 333         | 2266        | 696         | 22.5              | 0.45            |
| <i>Rhopalomastix</i>    | <i>rothneyi</i>      | 0.15                      | 42.6                       | 941,110          | 14311  | 9.5               | 415         | 2155        | 619         | 17.5              | 0.46            |
| <i>Rhytidoponera</i>    | <i>chalybaea</i>     | 3.25                      | 24.8                       | 1,036,012        | 14902  | 11.4              | 432         | 2173        | 701         | 24.4              | 0.54            |
| <i>Romblonella</i>      | <i>elysii</i>        | 0.13                      | 7.1                        | 816,410          | 7693   | 21.1              | 320         | 1744        | 296         | 40.0              | 0.44            |
| <i>Romblonella</i>      | <i>scrobifera</i>    | 0.64                      | 29.5                       | 2,685,928        | 66286  | 9.4               | 307         | 2348        | 537         | 61.4              | 0.36            |
| <i>Rostromyrmex</i>     | <i>pasohensis</i>    | <0.05                     | 4.4                        | 1,536,317        | 16102  | 14.7              | 372         | 900         | 384         | 29.0              | 0.13            |
| <i>Rotastruma</i>       | <i>recava</i>        | 1.32                      | 46.7                       | 2,955,171        | 47597  | 13.0              | 313         | 2303        | 432         | 67.4              | 0.36            |
| <i>Rotastruma</i>       | <i>stenoceps</i>     | 2.96                      | 37.3                       | 1,188,961        | 21135  | 9.5               | 356         | 2219        | 634         | 23.8              | 0.47            |
| <i>Royidris</i>         | <i>longiseta</i>     | 0.95                      | 13.3                       | 2,384,460        | 86457  | 5.8               | 309         | 2342        | 870         | 39.1              | 0.41            |
| <i>Royidris</i>         | <i>notorthotenes</i> | 1.73                      | 47.4                       | 3,013,781        | 136632 | 6.1               | 311         | 2330        | 838         | 46.5              | 0.30            |
| <i>Stereomyrmex</i>     | <i>horni</i>         | <0.05                     | 5.9                        | 3,230,369        | 64965  | 7.6               | 296         | 2339        | 507         | 51.5              | 0.38            |
| <i>Strongylognathus</i> | <i>testaceus</i>     | 1.76                      | 81.2                       | 2,967,660        | 117519 | 6.4               | 313         | 2318        | 812         | 49.3              | 0.34            |

| Genus               | Species                | Pre-library conc. (ng/uL) | Post-library conc. (ng/uL) | Total read count | Count         | Avg. coverage (x) | Avg. length | Locus count | Avg. length | Avg. coverage (x) | Reads on target |
|---------------------|------------------------|---------------------------|----------------------------|------------------|---------------|-------------------|-------------|-------------|-------------|-------------------|-----------------|
| <i>Temnothorax</i>  | <i>bernardi</i>        | 2.28                      | 27.6                       | 892,391          | 13663         | 9.9               | 396         | 2132        | 595         | 19.9              | 0.48            |
| <i>Temnothorax</i>  | <i>kutteri</i>         | 0.58                      | 33.9                       | 2,043,600        | 52045         | 8.0               | 349         | 2316        | 671         | 35.4              | 0.36            |
| <i>Temnothorax</i>  | <i>poeyi</i>           | 3.09                      | 40.3                       | 3,880,794        | 136816        | 7.3               | 315         | 2359        | 821         | 60.2              | 0.33            |
| <i>Temnothorax</i>  | <i>rugatulus</i>       | 0.11                      | 46.7                       | 965,183          | 17124         | 9.2               | 366         | 2174        | 560         | 19.3              | 0.42            |
| <i>Terataner</i>    | <i>bottegoi</i>        | 1.69                      | 24.3                       | 3,683,051        | 100310        | 9.0               | 311         | 2376        | 624         | 73.9              | 0.34            |
| <i>Terataner</i>    | <i>MG02</i>            | 2.28                      | 50.8                       | 2,861,595        | 94447         | 7.2               | 317         | 2322        | 774         | 40.7              | 0.29            |
| <i>Terataner</i>    | <i>MG27</i>            | 27.10                     | 43.8                       | 1,631,503        | 26016         | 9.6               | 353         | 2249        | 589         | 25.4              | 0.36            |
| <i>Tetheamyрма</i>  | <i>subsporgia</i>      | <0.05                     | 4.9                        | 1,238,435        | 17820         | 9.5               | 333         | 2109        | 453         | 18.0              | 0.30            |
| <i>Tetramorium</i>  | <i>atratum</i>         | 0.68                      | 68.8                       | 1,564,773        | 26914         | 10.3              | 310         | 2281        | 570         | 53.9              | 0.63            |
| <i>Tetramorium</i>  | <i>immigrans</i>       | 0.14                      | 46.5                       | 1,029,058        | 21189         | 7.5               | 347         | 2250        | 671         | 24.0              | 0.58            |
| <i>Tetramorium</i>  | <i>CF01</i>            | 0.55                      | 49.4                       | 3,222,266        | 116574        | 7.0               | 329         | 2328        | 800         | 53.9              | 0.33            |
| <i>Tetramorium</i>  | <i>kutteri</i>         | 0.36                      | 32.0                       | 2,914,419        | 119186        | 6.3               | 303         | 2351        | 805         | 58.4              | 0.39            |
| <i>Tetramorium</i>  | <i>MG125</i>           | <0.05                     | 25.8                       | 3,751,920        | 153528        | 6.6               | 319         | 2369        | 785         | 60.1              | 0.31            |
| <i>Tetramorium</i>  | <i>severini</i>        | 2.54                      | 40.4                       | 2,473,079        | 73324         | 7.1               | 327         | 2318        | 671         | 38.7              | 0.32            |
| <i>Tetramorium</i>  | <i>spinosum</i>        | 1.20                      | 55.6                       | 1,876,258        | 57239         | 6.6               | 313         | 2321        | 717         | 34.3              | 0.42            |
| <i>Tetramorium</i>  | <i>taylori</i>         | 2.39                      | 65.3                       | 1,608,792        | 31548         | 8.7               | 365         | 2272        | 769         | 32.5              | 0.46            |
| <i>Tetramorium</i>  | <i>transversinodis</i> | 1.28                      | 46.0                       | 3,106,375        | 125855        | 6.8               | 317         | 2332        | 639         | 52.5              | 0.29            |
| <i>Tetramorium</i>  | <i>validiusculum</i>   | 0.40                      | 69.7                       | 942,664          | 13830         | 9.2               | 389         | 2212        | 675         | 20.3              | 0.57            |
| <i>Tetramorium</i>  | <i>venator</i>         | 0.57                      | 50.7                       | 4,435,726        | 169231        | 7.2               | 341         | 2357        | 790         | 68.6              | 0.28            |
| <i>Trichomyrmex</i> | <i>criniceps</i>       | 1.71                      | 96.6                       | 1,645,368        | 27117         | 10.8              | 349         | 2278        | 648         | 32.1              | 0.39            |
| <i>Trichomyrmex</i> | <i>destructor</i>      | 1.22                      | 89.1                       | 697,823          | 10413         | 10.2              | 379         | 2155        | 544         | 18.3              | 0.53            |
| <i>Trichomyrmex</i> | <i>robustior</i>       | 0.57                      | 38.9                       | 1,066,078        | 15448         | 12.2              | 400         | 2211        | 613         | 22.1              | 0.45            |
| <i>Vitsika</i>      | <i>brevis</i>          | 0.64                      | 45.2                       | 4,724,175        | 179909        | 7.6               | 349         | 2358        | 880         | 68.0              | 0.26            |
| <i>Vitsika</i>      | <i>producta</i>        | 5.84                      | 12.5                       | 960,659          | 10840         | 11.1              | 417         | 2282        | 672         | 22.4              | 0.61            |
| <i>Vitsika</i>      | <i>susplicax</i>       | 0.43                      | 51.0                       | 3,049,036        | 89424         | 8.0               | 320         | 2337        | 708         | 43.8              | 0.31            |
| <i>Vollenhovia</i>  | <i>emeryi</i>          | 0.83                      | 55.9                       | 3,197,618        | 91107         | 8.2               | 324         | 2218        | 736         | 44.7              | 0.31            |
| <i>Vollenhovia</i>  | <i>MM01</i>            | 0.32                      | 23.6                       | 911,477          | 15192         | 9.2               | 358         | 2094        | 647         | 20.7              | 0.53            |
| <i>Vollenhovia</i>  | <i>rufiventris</i>     | 0.76                      | 10.9                       | 4,515,131        | 103582        | 9.7               | 286         | 2305        | 527         | 96.7              | 0.38            |
| <i>Vombisidris</i>  | <i>bilongrudi</i>      | 0.45                      | 33.4                       | 3,219,488        | 84011         | 8.7               | 318         | 2354        | 718         | 47.3              | 0.32            |
| <i>Xenomyrmex</i>   | <i>floridanus</i>      | 0.79                      | 68.1                       | 1,980,281        | 46774         | 7.7               | 342         | 2304        | 782         | 31.6              | 0.41            |
| <i>Xenomyrmex</i>   | <i>stollii</i>         | 0.26                      | 6.8                        | 4,198,385        | 126531        | 6.2               | 320         | 2371        | 862         | 69.5              | 0.44            |
|                     | <b>Average</b>         | <b>2.14</b>               | <b>32.5</b>                | <b>2,279,011</b> | <b>59518</b>  | <b>9.4</b>        | <b>347</b>  | <b>2200</b> | <b>654</b>  | <b>42.1</b>       | <b>0.42</b>     |
|                     | <b>min</b>             | <b>&lt;0.05</b>           | <b>0.3</b>                 | <b>13,667</b>    | <b>136</b>    | <b>4</b>          | <b>235</b>  | <b>103</b>  | <b>229</b>  | <b>4.7</b>        | <b>0.13</b>     |
|                     | <b>max</b>             | <b>27.10</b>              | <b>105.0</b>               | <b>5,845,581</b> | <b>228374</b> | <b>28.1</b>       | <b>606</b>  | <b>2399</b> | <b>1049</b> | <b>123.2</b>      | <b>0.94</b>     |

**Table S7: Alignment statistics.** Calculated with AMAS (Borowiec 2016) from the 90% complete matrix, the 50-best, the 50-random-1, and the 50-random-2 matrices.

| <b>Alignment name</b> | <b>Taxa</b> | <b>Alignment length (bp)</b> | <b>Proportion missing</b> | <b>Variable sites</b> | <b>Prop. variable sites</b> | <b>PIC</b> | <b>Prop PIC</b> | <b>Heterogeneity score (RCFV)</b> | <b>AT content</b> | <b>GC content</b> |
|-----------------------|-------------|------------------------------|---------------------------|-----------------------|-----------------------------|------------|-----------------|-----------------------------------|-------------------|-------------------|
| UCE-complete-90%      | 161         | 913718                       | 0.18                      | 538960                | 0.59                        | 447069     | 0.49            | 0.012                             | 0.56              | 0.44              |
| UCE-50-best           | 161         | 33874                        | 0.19                      | 21138                 | 0.62                        | 18043      | 0.53            | 0.016                             | 0.61              | 0.39              |
| UCE-50-random-1       | 161         | 24984                        | 0.20                      | 15122                 | 0.61                        | 12575      | 0.50            | 0.014                             | 0.56              | 0.44              |
| UCE-50-random-2       | 161         | 25188                        | 0.19                      | 14862                 | 0.59                        | 12173      | 0.48            | 0.015                             | 0.55              | 0.45              |
